# Supplementary material for: VISPR-online: a web-based interactive tool to visualize CRISPR screening experiments
Source: Springer Nature journal article supplement (doi:10.1186/s12859-021-04275-5), 2021-06-24
Supplement: 12859_2021_4275_MOESM2_ESM.pdf [file 12859_2021_4275_MOESM2_ESM.pdf]

# VISPR-online

VISPR-online is a web-based interactive framework for CRISPR screens visualization, exploration and sharing.

## Table of Contents

1. [Description](#)
2. [Installation](#)
3. [Demo Test](#)
4. [FAQs](#)
5. [License](#)
6. [Contact](#)

## I. Description

VISPR-online is a web-based interactive framework for CRISPR screens visualization, exploration and sharing.

CRISPR screening helps systematically exploration of the functions of coding and non-coding elements in a genome. We previously developed [MAGeCK](#) and [MAGeCK-VISPR](#) to perform CRISPR screening data analysis. VISPR is a visualization tool included in [MAGeCK-VISPR](#), which can be used to explore interesting genes. However, VISPR is designed for local use and some manual configurations need be set to run the program. To help the community to access the tool easily, we improve the tool and develop an online version: VISPR-online.

The advantages of VISPR-online compared with VISPR:

- Support more screening analysis tools, including MAGeCK, BAGEL and JACKS.
- Installation and configuration free. Easy to access via a browser.
- Support interactive view of sgRNA locations in the gene context.
- Enable to resume and share data and sessions.

## II. Installation

VISPR-online can also be installed in a local computer or network for internal use.

### Step1:

Download VISPR-online source code.

```
$ git clone https://github.com/lemoncyb/VISPR-online.git
```

### Step2:

To install VISPR-online you please use the Python 3 variant of the Miniconda Python distribution (<http://conda.pydata.org/miniconda.html>). When installing Miniconda, make sure that you answer yes to this question:

```
Do you wish the installer to prepend the Miniconda3 install location to PATH ...? [yes|no]
```

Also, make sure that you do not have set the PYTHONPATH environment variable, because it will interfere with the Miniconda setup.

### Step3:

Because the default channels of conda does not have some versions of dependent packages, add the download channels of conda by executing:

```
$conda config --add channels https://repo.anaconda.com/pkgs/free/
```

### Step4:

Enter the top directory of VISPR-online:

```
$cd VISPR-online
```

In the terminal or an Anaconda Prompt, create an isolated software environment for vispr-online by executing:

```
$conda env create -f ./environment.yml
```

**Note:** If the error `ResolvePackageNotFound:-pandas==0.19.1` is reported, please skip to [FAQs](#) setup.

### Step5:

Then, activate the environment by running

```
$conda activate vispr-online
```

conda activate and conda deactivate only work on conda 4.6 and later versions. For conda versions prior to 4.6, run:

Windows:

```
$activate vispr-online
```

Linux and macOS:

```
$source activate vispr-online
```

For detailed manual of miniconda, please refer to <https://conda.io/projects/conda/en/latest/user-guide/tasks/manage-environments.html>

### III. Demo test

#### Step1:

Launch VISPR-online server.

Enter the top directory of VISPR-online. Execute the following script:

Windows:

```
$python ./run.py
```

Linux and macOS:

```
$ ./run.py
```

Open your browser and access <http://127.0.0.1:5000>. You will see the following page if successful.

The screenshot shows the VISPR-online web interface. At the top, there is a navigation bar with 'VISPR-online', 'Home', 'Tutorial', and 'FAQs'. The main heading is 'Visualization of CRISPR screens'. Below this, a sidebar on the left contains 'Upload Files' and 'Load Session' buttons. Under 'Upload Files', there are tabs for 'MAGeCK', 'BAGEL', and 'JACKS'. The sidebar lists seven steps: 1. Select Species (HOMO\_SAPIENS), 2. Gene Summary (no file selected), 3. Normalized Count (no file selected), 4. sgRNA Summary (no file selected), 5. sgRNA Location (no file selected), 6. Select Save Session (checkbox), and 7. Submit List (Submit button). The main content area has a list of capabilities: Explore gene essentiality, View gRNAs in their genomic context, View normalized gRNAs counts, Inspect P values, View gene in Ensembl, Analyze genes interaction network via GeneMANIA, Gene functional analysis via GORilla, and Resume and share session. Below this is a table of results with columns: target, beta-score, p-value, FDR, and a bar chart icon. The table lists RPL6, SF3B1, and UTP18. A search bar and a 'Show: 10' dropdown are also visible.

VISPR-online Home Tutorial FAQs

## Visualization of CRISPR screens

VISPR-online is an on-line tool to interactively visualize and analyze CRISPR screening experiments. It supports popular screening analysis tools, including **MAGeCK**, **BAGEL** and **JACKS**.

What can we do with VISPR-online:

- Explore gene essentiality
- View gRNAs in their genomic context
- View normalized gRNAs counts
- Inspect *P* values
- View gene in Ensembl
- Analyze genes interaction network via [GeneMANIA](#)
- Gene functional analysis via [GORilla](#)
- Resume and share session

Click [here](#) to load demo and explore VISPR-online.  
Click [here](#) to download test data.

| target | beta-score | p-value | FDR  |  |
|--------|------------|---------|------|--|
| RPL6   | -2.2       | 8e-05   | 0.28 |  |
| SF3B1  | -2.2       | 8e-05   | 0.28 |  |
| UTP18  | -2         | 0.00013 | 0.28 |  |

#### Step2:

A demo is integrated in VISPR-online repository. You could click the demo link on home page to load the project and explore the results.

#### Step3:

A test dataset is contained in VISPR-online repository. The path is `VISPR-online/vispr_screen/static/data/testdata.zip`. The dataset contains the following files:

- `mle.gene_summary.txt`: gene summary file.
- `all.count_normalized.txt`: normalized count file.
- `mle.sgrna_summary.txt`: sgRNA summary file.
- `sgrnas.bed`: sgRNA location file.
- `README.txt`: README file.

**Note:** The input of VISPR-online are direct output of screening analysis tools, so the input file types and file names are customized for different tools. Users could match files by the file suffix. For example, the name of gene summary file of MAGeCK ends with `".gene_summary.txt"`. Besides, the corresponding file suffix will appear when the mouse hovers over the file type, as shown in the figure below.

This close-up shows the 'Upload Files' sidebar. Under 'Step 1: Select Species', the dropdown menu is open, showing 'HOMO\_SAPIENS' and a tooltip that says '\*gene\_summary.txt'. Under 'Step 2: Gene Summary', there is a 'Choose File' button and the text 'No file chosen'.

We summarize the file suffix of VISPR-online input in the table below. We also added this table and more detailed information of input file in the tutorial page.

Table 1. File suffix of VISPR-online input

| Tools  | Output file      | Suffix of output file     | VISPR-online input |
|--------|------------------|---------------------------|--------------------|
| MAGeCK | Gene summary     | *.gene_summary.txt        | Gene summary       |
|        | Normalized count | *.count_normalized.txt    | Normalized count   |
|        | sgRNA summary    | *.sgrna_summary.txt       | sgRNA summary      |
| BAGEL  | Foldchange       | *.foldchange.txt          | Foldchange         |
| JACKS  | Gene score       | *_gene_JACKS_results.txt  | Gene score         |
|        | Foldchange       | *_logfoldchange_means.txt | foldchange         |

**Step4:**

Upload corresponding files to VISPR-online. Then click the "Submit" button to explore the results. The results pages are like this.

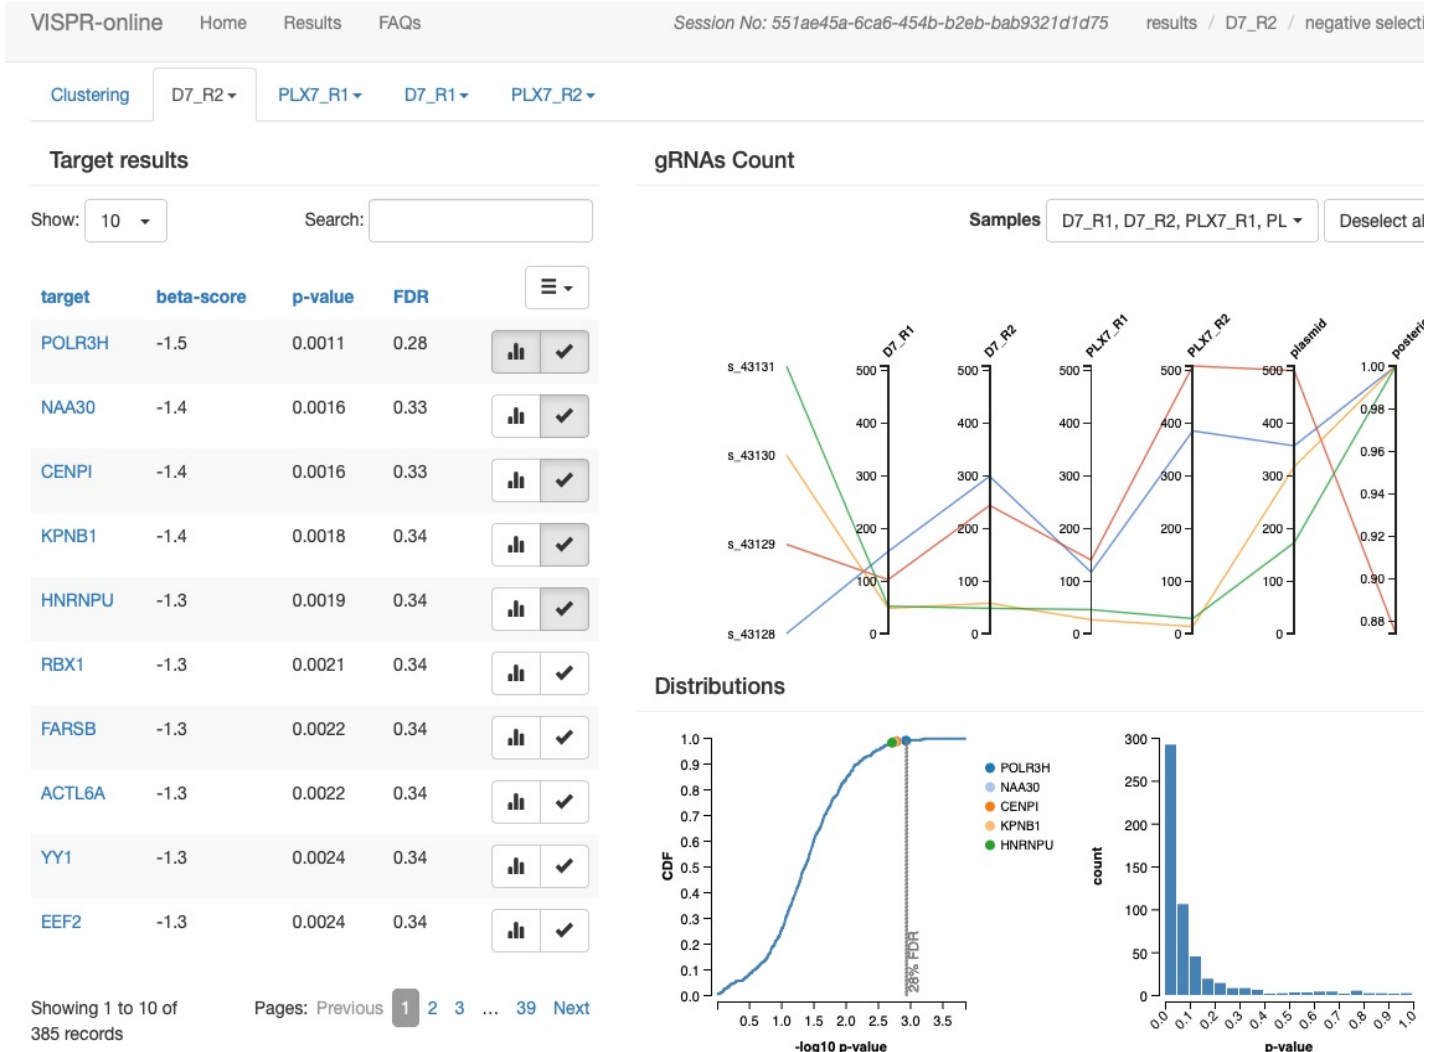

**IV. FAQs**

**Error1:**

If the error `ResolvePackageNotFound:-pandas==0.19.1` is reported, please follow the steps below to install:

**Step1: Create an environment with a specific version of Python:**

```
$conda create -n vispr-online python=3.5
```

**Step2: Activate the environment by running**

```
$conda activate vispr-online
```

**Step3: Install related Python dependencies.**

```
$ pip install flask
$ pip install pymongo
$ pip install PyYAML
$ pip install numpy
$ pip install pandas==0.19.1 -i http://pypi.douban.com/simple --trusted-host pypi.douban.com
$ pip install sklearn
```

### **Error2:**

If the error *ImportError: cannot import name 'EmptyDataError' from 'pandas.io.common'* is reported, it is because the version of panda is not compatible. Please follow the above steps to install pandas version 0.19.1.

### **Error3:**

The error *"usr/bin/env: 'python': No such file or directory"* when running the run.py script. This is because the first line of the run.py script assumes that python is an alias to python3. Please install python3 to resolve this error.

## **License**

Licensed under the [MIT license](#). This project may not be copied, modified, or distributed except according to those terms.

## **Contact**

Yingbo Cui [yingbocui@nudt.edu.cn](mailto:yingbocui@nudt.edu.cn)
